# Supplementary material for: Performance Evaluation of the Becton Dickinson FACSPresto™ Near-Patient CD4 Instrument in a Laboratory and Typical Field Clinic Setting in South Africa
Source: PLoS One. 2016 May 25;11(5):e0156266. doi: 10.1371/journal.pone.0156266 (PMC4880207; doi:10.1371/journal.pone.0156266)
Supplement: S1 Fig — (XLSX) [file pone.0156266.s001.xlsx]

## Sheet: 4-way comparison
Absolute CD4 count						CD4% Lymphs
Sample no	MPL/PLG	FACSPRESTO	FACSCOUNT	TCELL		MPL/PLG	FACSPRESTO	FACSCOUNT	TCELL
1	431	446	455	413		29.32	30.26	27.52	28.7
2	67	70	75	66		8.61	7.81	7.39	8.1
3	512	538	548	487		24.61	24.42	23.33	23.2
4	646	734	745	632		20.1	21.6	20.41	20.5
5	666	696	741	624		35.56	37.89	34.66	36.5
6	523	561	519	499		23.29	29.24	23.49	22.4
7	202	216	218	190		10.29	10.92	9.58	9.4
8	305	260	332	286		18.67	15.25	18.63	18.6
9	54	59	48	53		3.46	3.61	2.83	3.45
10	972	961	1014	923		27.02	30.34	25.76	28
11	29	20	22	23		14.61	12.13		13.3
12	236	251	245	241		18.15	19.52	16.58	17.9
13	463		492	432		22.09		22.41	22.8
14	265	334	291	253		18.03	20.9	16.59	18.2
15	437	458	483	428		27.54	28.92	27.32	28.8
16	420	383	397	390		19.85	18.94	19.81	20.4
17	364	536	355	327		14.59	16.76	14.27	15.3
18	367	418	444	374		23.45	26.4	24.64	25.2
19	168		188	153		5		5.61	5.82
20	9	6	5	7		4.41	3.39		4.28
21	99	118	111	95		15.08	17.68	15.5	15.7
22	323	417	363	351		14.25	16.2	13.91	16
23	425	445	419	394		24.66	25.56	23.69	26.2
24	721	781	826	692		23.2	24.05	21.57	22.5
25	520	611	518	455		17.21	19.12	14.01	17.1
26	288	327	347	257		20.01	19.49	16.75	18.7
27	252	270	299	240		9.8	9.99	9.39	9.62
28	786	881	822	850		23.78	26.24	22.69	24.2
29	20	13	18	19		1.92	1.31	1.75	2.07
30	381	400	448	380		17.15	18.23	17.28	18.1
31	513	556	505	481		18.09	18.86	15.53	17.5
32	114	114	116	106		8.29	8.07		8.59
33	561	576	625	551		23.98	23.76	23.58	24
34	80		104	85		4.17		4.87	4.78
35	466	521	503	475		22.65	25.79	22.02	23.3
36	608	706	568	507		25.13	27.03	23.07	23.9
37	325	444	337	303		19.26	24.33	20.6	20.4
38	409		474	383		17.87		18.35	18.4
39	711	787	721	677		23.9	26	23.74	24.9
40	537	594	587	497		26.59	28.67	26.22	27.2
41	552	573	743	569		19.77	20.21	19.13	21.2
42	133	159	145	137		11.04	14.27	10.94	12.5
43	359	383	356	335		15.06	15.58	13.26	15.8
44	17		20	24		1.4		1.99	2.75
45	19		26	20		1.79			2.11
46	196	178	199	158		13.76	12.74	11.62	12.2
47	15	28	19	17		3.16	5.91		4.11
48	172	236	207	169		7.15	9.38	7.67	8.18
49	200	250	207	180		14.98	16.42	13.5	14.7
50	684	730	689	561		27.7	30.09	26.56	28
51	312	342	353	317		19.97	19.56	19.3	19.8
52	837	829	870	704		31.56	31.98	29.12	30.5
53	441	480	488	380		22.89	22.99	23.04	22.9
54	282	346	326	254		23.49	28.13	24.2	24.5
55	585	762	676	659		19.2	23.65	19.32	22.3
56	386	447	452	350		21.13	24.49	22.21	23.1
57	47		57	49		5.5		5.3	5.37
58	948	924	915	861		33.15	32.56	29.12	31.5
59	226	300	284	245		14.43	17.6	14.42	15
60	334	363	365	295		31.22	29.46	28.95	29.6
61	512	613	560	495		27.97	31.37	26.23	27.4
62	450	514	517	442		16.53	18.29	17.57	17.4
63	883	934	1023	718		32.52	34.25	32.18	34
64	229	257	275	64		26.4	27.95	24.68	29.1
65	94	104	89	85		12.04	13.29	10.27	11.4
66	128		118	109		25.07			21.4
67	294	362	356	290		24.43	26.16	24.3	23.9
68	557	709	669	555		22.92	27.08	24.53	25.8
69	252	352	362	250		16.52	18.11	14.94	17
70	13		15	14		1.8		1.42	1.51
71	157	171	186	122		14.95	13.89	13.18	12.6
72	193	247	205	184		4.05	6.56	3.7	4.15
73	384	427	433	362		8.6	9.12	8.49	9.25
74	94	105	108	84		3.01	3.42	3.19	3.32
75	497	542	574	491		25.77	27.1	25.43	25.8
76	13		8	9		1.12		0.66	0.89
77	98		109	96		14.27		10.15	14.4
78	439	535	462	382		19.78	21.93	19.08	19.8
79	80	57	98	77		4.63	3.07	4.38	4.56
80	740	796	784	603		21.87	22.68	20.71	21.2
81	273	284	311	263		24.03	25.02	22.49	25.1
82	145	152	146	123		13.27	14.25	11.96	12.8
83	1610	1603	1852	1417		49.08	47.13	45.47	49.1
84	427	499	433	387		14.95	17.94	14.78	16.4
85	557	618	641	534		39.7	40.39	29.56	39.8
86	331	292	327	290		13.52	14.26	11.52	13.3
87	68	101	92	82		10.08	10.47	8.97	10.8
88	360	342	349	284		15.4	14.55	14.72	14.8
89	132	138	134	115		13.73	14.24	9.94	13.2
90	248	313	307	231		19.5	21.2	17.7	18.8
91	518	531	538	477		28.59	30.32	28.01	30
92	417	469	371	318		18.88	19.84	18.24	18.5
93	426		433	388		25.91		26.64	27.2
94	260	281	281	238		18.85	19.03	16.67	18.2
95	437	484	503	426		20.4	23.26	21.15	21.5
96	160	177	203	151		17.28	18.44	18.44	18.9
97	513	520	506	428		22.83	23.99	22.62	23.6
98	189	184	191	157		8.11	8.21	7.24	7.85
99	555		602	459		34.23		29.63	33.3
100	1019	1088	1219	996		21.9	21.91	21.23	22.8
101	510	567	604	507		29.23	30.09	27.43	28.3
102	515	571	591	475		20.4	20.93	20.09	21
103	568	560	597	513		26.82	28.48	25.66	28.2
104	466		537	433		19.36		20.35	19.4
105	641	644	682	648		28.27	28.68	26.56	28.2
106	119	168	165	131		5.57	7.04	5.49	6.32
107	461	515	499	493		32.72	34.5	24.71	32.1
108	358	433	471	334		20.47	24.37	21.47	21.2
109	414	432	405	320		20.17	20.48	16.79	17.9
110	589	629	632	475		28.6	31.94	29.35	30.2
111	437	395	353	350		14.46	17.35	14.21	14.3
112	307	348	331	261		33.12	34.15	31.57	34
113	357	450	411	392		17.45	19.82	16.31	17.4
114	145	171	157	141		17.64	18.62	16.16	17.4
115	622	659	549	566		24.85	24.72	21.54	23.1
