# Supplementary material for: Performance Evaluation of the Becton Dickinson FACSPresto™ Near-Patient CD4 Instrument in a Laboratory and Typical Field Clinic Setting in South Africa
Source: PLoS One. 2016 May 25;11(5):e0156266. doi: 10.1371/journal.pone.0156266 (PMC4880207; doi:10.1371/journal.pone.0156266)
Supplement: S1 Table — (XLSX) [file pone.0156266.s005.xlsx]

## Sheet: Phase I VS
Venous sampling Phase I laboratory Presto vs MPL PLG
	PLG MPL		Presto		%Similarity						#CD4	CD4%
Sample no	PLGCD4#	PLGCD4%	PrestoCD4#	PrestoCD4%	%SimCD4#	%SimCD4%			Category	n	MW P value	MW P value
1	9	4.41	6	3.39	83.3333	88.4354			All	179	0.0833	0.1181
2	13	4.95	29	7.3	161.538	123.737			<100	28	0.2484	0.674
3	15	3.16	28	5.91	143.333	143.513			100-349	52	0.0291*	0.274
4	16	2.88	11	1.47	84.375	75.5208			350-499	49	<0.0001***	0.0885
5	17	1.94	25	2.1	123.529	104.124			>500	50	0.0721	0.1567
6	19	4.15	23	4.78	110.526	107.59			0-349 (<350)	80	0.137	0.2901
7	20	1.92	13	1.31	82.5	84.1146			0-499 (<500)	129	0.058	0.153
8	28	6.95	34	7.39	110.714	103.165			>100	151	0.0345*	0.061
9	29	14.61	20	12.13	84.4828	91.5127
10	31	4.16	38	4.64	111.29	105.769			Both Parameters	<100	100-349	350-499	>500	>100	All
11	34	5.74	32	5.54	97.0588	98.2578			PLG	54	55	53	52	160	214
12	42	6.16	53	5.49	113.095	94.5617			Presto	28	52	49	50	151	179
13	46	3.67	47	3.96	101.087	103.951
14	49	5.08	93	8.66	144.898	135.236			%Error	48.1481	5.45455	7.54717	3.84615	5.625	16.3551
15	54	3.46	59	3.61	104.63	102.168
16	56	22.94	55	19.48	99.1071	92.4586			Resulted Presto	28	80	129	50	151	179
17	67	8.61	70	7.81	102.239	95.3542
18	68	10.08	101	10.47	124.265	101.935
19	78	5.4	111	6.28	121.154	108.148
20	80	4.63	57	3.07	85.625	83.1533
21	81	13.72	111	13.99	118.519	100.984
22	86	8.22	96	9.48	105.814	107.664
23	87	7.41	146	9.9	133.908	116.802
24	94	12.04	104	13.29	105.319	105.191
25	94	3.01	105	3.42	105.851	106.811
26	96	11.68	121	12.87	113.021	105.094
27	97	7.49	119	8.01	111.34	103.471
28	99	15.08	118	17.68	109.596	108.621
29	100	3.44	80	7.15	90	153.924
30	102	14.48	108	15.73	102.941	104.316
31	114	8.29	114	8.07	100	98.6731
32	119	5.57	168	7.04	120.588	113.196
33	123	5.92	198	9.45	130.488	129.814
34	127	8.14	164	8.96	114.567	105.037
35	132	13.73	138	14.24	102.273	101.857
36	133	11.04	159	14.27	109.774	114.629
37	140	14.14	207	17.43	123.929	111.634
38	144	12.53	280	19.34	147.222	127.175
39	145	13.27	152	14.25	102.414	103.693
40	145	17.64	171	18.62	108.966	102.778
41	150	8.84	95	6.46	81.6667	86.5385
42	157	14.95	171	13.89	104.459	96.4548
43	160	17.28	177	18.44	105.313	103.356
44	172	7.15	236	9.38	118.605	115.594
45	189	8.11	184	8.21	98.6772	100.617
46	193	4.05	247	6.56	113.99	130.988
47	196	13.76	178	12.74	95.4082	96.2936
48	200	14.98	250	16.42	112.5	104.806
49	202	10.29	216	10.92	103.465	103.061
50	207	13.79	288	16.68	119.565	110.479
51	220	15.3	213	18.39	98.4091	110.098
52	226	14.43	300	17.6	116.372	110.984
53	229	26.4	257	27.95	106.114	102.936
54	236	18.15	251	19.52	103.178	103.774
55	247	22.67	283	23.52	107.287	101.875
56	247	17.66	294	19.83	109.514	106.144
57	248	19.5	313	21.2	113.105	104.359
58	252	9.8	270	9.99	103.571	100.969
59	252	16.52	352	18.11	119.841	104.812
60	257	21.07	260	22.05	100.584	102.326
61	260	18.85	281	19.03	104.038	100.477
62	265	18.03	334	20.9	113.019	107.959
63	273	24.03	284	25.02	102.015	102.06
64	282	23.49	346	28.13	111.348	109.877
65	288	20.01	327	19.49	106.771	98.7006
66	290	13.42	364	14.85	112.759	105.328
67	292	14.61	345	16.5	109.075	106.468
68	292	9.18	363	11.18	112.158	110.893
69	294	24.43	362	26.16	111.565	103.541
70	298	8.79	338	9.79	106.711	105.688
71	301	23.64	301	23.29	100	99.2597
72	305	18.67	260	15.25	92.623	90.8409
73	307	33.12	348	34.15	106.678	101.555
74	312	19.97	342	19.56	104.808	98.9735
75	322	26.33	336	25.39	102.174	98.215
76	323	14.25	417	16.2	114.551	106.842
77	325	19.26	444	24.33	118.308	113.162
78	331	13.52	292	14.26	94.1088	102.737
79	334	31.22	363	29.46	104.341	97.1813
80	340	20.66	410	22.26	110.294	103.872
81	357	17.45	450	19.82	113.025	106.791
82	358	20.47	433	24.37	110.475	109.526
83	359	15.06	383	15.58	103.343	101.726
84	360	15.4	342	14.55	97.5	97.2403
85	363	23.51	355	23.7	98.8981	100.404
86	364	14.59	536	16.76	123.626	107.437
87	367	23.45	418	26.4	106.948	106.29
88	373	13.05	399	13.89	103.485	103.218
89	373	27.31	446	29.7	109.786	104.376
90	381	17.15	400	18.23	102.493	103.149
91	381	16.73	483	19.55	113.386	108.428
92	381	19.42	410	22.08	103.806	106.849
93	384	8.6	427	9.12	105.599	103.023
94	386	21.13	447	24.49	107.902	107.951
95	406	20.67	464	23.39	107.143	106.58
96	414	20.17	432	20.48	102.174	100.768
97	415	19.01	447	21.56	103.855	106.707
98	417	18.88	469	19.84	106.235	102.542
99	420	19.85	383	18.94	95.5952	97.7078
100	422	15.72	550	19.19	115.166	111.037
101	425	24.66	445	25.56	102.353	101.825
102	425	13.15	478	15.6	106.235	109.316
103	427	14.95	499	17.94	108.431	110
104	431	29.32	446	30.26	101.74	101.603
105	436	25.77	491	27.39	106.307	103.143
106	437	27.54	458	28.92	102.403	102.505
107	437	20.4	484	23.26	105.378	107.01
108	437	14.46	395	17.35	95.1945	109.993
109	438	21.5	518	23.62	109.132	104.93
110	439	19.78	535	21.93	110.934	105.435
111	441	22.89	480	22.99	104.422	100.218
112	442	21.7	497	24.75	106.222	107.028
113	449	23.34	521	25.29	108.018	104.177
114	450	16.53	514	18.29	107.111	105.324
115	450	29.27	491	31.48	104.556	103.775
116	454	20.58	562	22.86	111.894	105.539
117	454	13.38	503	16.07	105.396	110.052
118	461	32.72	515	34.5	105.857	102.72
119	461	31.63	562	34.81	110.954	105.027
120	466	22.65	521	25.79	105.901	106.932
121	466	16.59	594	20.4	113.734	111.483
122	470	12.36	512	13.67	104.468	105.299
123	471	15.93	643	18.94	118.259	109.448
124	473	30.18	527	31.01	105.708	101.375
125	478	17.16	590	19.64	111.715	107.226
126	493	15.94	612	18.14	112.069	106.901
127	496	21.51	516	22.64	102.016	102.627
128	497	25.77	542	27.1	104.527	102.581
129	497	10.44	684	12.37	118.813	109.243
130	506	20.65	576	22.27	106.917	103.923
131	510	29.23	567	30.09	105.588	101.471
132	511	20.2	510	22	99.9022	104.455
133	512	24.61	538	24.42	102.539	99.614
134	512	27.97	613	31.37	109.863	106.078
135	513	18.09	556	18.86	104.191	102.128
136	513	22.83	520	23.99	100.682	102.541
137	514	16.9	544	18.02	102.918	103.314
138	515	20.4	571	20.93	105.437	101.299
139	517	21.27	544	23.24	102.611	104.631
140	518	28.59	531	30.32	101.255	103.026
141	520	17.21	611	19.12	108.75	105.549
142	523	23.29	561	29.24	103.633	112.774
143	537	26.59	594	28.67	105.307	103.911
144	542	44.7	625	47.52	107.657	103.154
145	552	19.77	573	20.21	101.902	101.113
146	557	22.92	709	27.08	113.645	109.075
147	557	39.7	618	40.39	105.476	100.869
148	561	23.98	576	23.76	101.337	99.5413
149	568	26.82	560	28.48	99.2958	103.095
150	585	19.2	762	23.65	115.128	111.589
151	586	22.3	582	23.18	99.6587	101.973
152	589	28.6	629	31.94	103.396	105.839
153	608	25.13	706	27.03	108.059	103.78
154	612	27.1	665	28.64	104.33	102.841
155	622	24.85	659	24.72	102.974	99.7384
156	637	37.75	579	38.16	95.4474	100.543
157	641	28.27	644	28.68	100.234	100.725
158	646	20.1	734	21.6	106.811	103.731
159	666	35.56	696	37.89	102.252	103.276
160	670	21.13	784	23.24	108.507	104.993
161	684	27.7	730	30.09	103.363	104.314
162	696	26.73	824	30.51	109.195	107.071
163	711	23.9	787	26	105.345	104.393
164	721	23.2	781	24.05	104.161	101.832
165	740	21.87	796	22.68	103.784	101.852
166	761	32.35	805	34.87	102.891	103.895
167	769	29.94	857	33.25	105.722	105.528
168	786	23.78	881	26.24	106.043	105.172
169	802	29.33	790	29.18	99.2519	99.7443
170	837	31.56	829	31.98	99.5221	100.665
171	843	23.84	920	25.86	104.567	104.237
172	883	32.52	934	34.25	102.888	102.66
173	910	30.16	806	31.11	94.2857	101.575
174	918	39.83	952	41.99	101.852	102.712
175	948	33.15	924	32.56	98.7342	99.1101
176	972	27.02	961	30.34	99.4342	106.144
177	1019	21.9	1088	21.91	103.386	100.023
178	1102	40.46	1077	39.8	98.8657	99.1844
179	1610	49.08	1603	47.13	99.7826	98.0134
