# Supplementary material for: Performance Evaluation of the Becton Dickinson FACSPresto™ Near-Patient CD4 Instrument in a Laboratory and Typical Field Clinic Setting in South Africa
Source: PLoS One. 2016 May 25;11(5):e0156266. doi: 10.1371/journal.pone.0156266 (PMC4880207; doi:10.1371/journal.pone.0156266)
Supplement: S2 Fig — (XLSX) [file pone.0156266.s002.xlsx]

## Sheet: Reproducibility
SAMPLE 1	Immunotrol Normal			Immunotrol Low			SAMPLE	PATIENT SAMPLE HIGH: CD4#				SAMPLE	PATIENT SAMPLE HIGH: CD4%
Repro	#CD4	CD4%		#CD4	CD4%		Repro	1	2	3		1	37.6	25.45	32.7
1	416	46.41		108	23.73		1	995	735	930		2	38.66	25.55	32.2
2	411	45.5		101	23.49		2	1039	731	926		3	37.25	25.43	31.68
3	384	43.63		104	23.1		3	997	755	968		4	36.95	25.21	32.61
4	389	43.24		111	25.53		4	1031	710	958		5	36.83	25.62	33.67
5	422	44.95		96	22.51		5	999	722	1022		6	36.51	25.94	32.47
6	413	44.9		116	25.78		6	1014	768	953		7	36.76	26.14	31.96
7	412	46.17		105	24		7	964	781	955		8	37.04	25.72	31.37
8	429	45.19		109	22.99		8	1035	747	953		9	36.3	25.5	32.47
9	421	44.81		108	22.52		9	1011	712	938		10	37.97	25.09	32.02
10	408	44.71		124	26.94		10	1008	744	946
SAMPLE 2							SAMPLE	PATIENT SAMPLE MEDIUM: CD4#				SAMPLE	PATIENT SAMPLE MEDIUM: CD4%
Repro	#CD4	CD4%		#CD4	CD4%		Repro	1	2	3		Repro	1	2	3
1	445	49.43		107	23.94		1	586	460	557		1	46	28.56	22.66
2	476	48.93		119	26.38		2	580	413	585		2	46.09	27.19	23.09
3	461	49.57		113	24.51		3	569	432	488		3	44.61	28.18	20.12
4	473	48.56		116	24.5		4	569	448	562		4	46.48	28.19	22.19
5	467	47.24		114	23.84		5	592	438	548		5	47.43	27.49	21.55
6	468	48.65		106	24.3		6	564	437	549		6	46.81	26.83	21.86
7	485	48.92		114	23.99		7	525	454	540		7	45.55	28.37	21.82
8	468	46.97		116	25.8		8	587	459	573		8	46.4	27.33	22.91
9	480	48.77		114	24.26		9	576	468	556		9	46.55	28.62	22.75
10	477	48.52		114	25.29		10	591	453	582		10	45.17	27.46	23.31
							SAMPLE	PATIENT SAMPLE LOW: CD4#				SAMPLE	PATIENT SAMPLE LOW: CD4%
							Repro	1	2	3		Repro	1	2	3
							1	114	139	169		1	6.3	12.95	12.4
							2	132	144	139		2	6.58	13.48	11.26
							3	113	169	134		3	5.71	14.45	10.72
							4	132	148	137		4	7.04	14.03	11.34
							5	110	129	150		5	5.5	12.87	11.47
							6	103	130	147		6	5.7	12.39	11.74
							7	107	161	139		7	5.32	14.93	11.31
							8	161	145	125		8	7.81	13.87	10.22
							9	96	149	133		9	5.08	13.79	10.98
							10	115	157	175		10	6.13	14.54	13.42
