# Supplementary material for: Performance Evaluation of the Becton Dickinson FACSPresto™ Near-Patient CD4 Instrument in a Laboratory and Typical Field Clinic Setting in South Africa
Source: PLoS One. 2016 May 25;11(5):e0156266. doi: 10.1371/journal.pone.0156266 (PMC4880207; doi:10.1371/journal.pone.0156266)
Supplement: S2 Table — (XLSX) [file pone.0156266.s006.xlsx]

## Sheet: Phase II All
	Capillary filled			Venous filled			Reference
	PRESTO RESULTS IN CLINIC			PRESTO RESULTS IN LAB			MPL RESULTS		%Sim MPL vs clinic			%Sim MPL vs Plab			%Sim PC vs PL
Sample no	CD4#	CD4%	HB	CD4#	CD4%	HB	CD4#	CD4%	CD4#	CD4%		CD4#	CD4%		CD4#	CD4%	HB
1	447	31.05	10.7	365	31.04	10.6	362	30.83	111.74	100.357		100.414	100.341		111.233	100.016	100.472
2	530	22.24	13.3	550	27.79	13.7	485	24.9	104.639	94.6586		106.701	105.803		98.1818	90.0144	98.5401
3	1155	35.32	12.5	805	37.49	11.6	631	33.31	141.521	103.017		113.788	106.274		121.739	97.1059	103.879
4	205	10.69	13.1	202	16.42	12.4	162	12.04	113.272	94.3937		112.346	118.189		100.743	82.5518	102.823
5	758	21.79	12.7	547	22.29	11.1	485	20.89	128.144	102.154		106.392	103.351		119.287	98.8784	107.207
6	541	32.89	11.2	494	33.71	11.5	472	32.8	107.309	100.137		102.331	101.387		104.757	98.7837	98.6957
7	262	10.28	13.2	283	13.94	12.3	255	12.21	101.373	92.0966		105.49	107.084		96.2898	86.8723	103.659
8	200	22.9	11.6	175	25.69	9.2	165	25.7	110.606	94.5525		103.03	99.9805		107.143	94.5699	113.043
9	330	15.34	13.8	291	9.44	11	219	10.26	125.342	124.756		116.438	96.0039		106.701	131.25	112.727
10	842	32.67	12.4	572	39.35	12.4	575	35.69	123.217	95.7691		99.7391	105.127		123.601	91.5121	100
11	410	34.24	16.3	348	36.6	14.6	337	36.56	110.831	96.8271		101.632	100.055		108.908	96.776	105.822
12	384	25.7	13.1	402	29.3	13.1	347	27.36	105.331	96.9664		107.925	103.545		97.7612	93.8567	100
13	445	32.16	12.3	459	35.97	13.7	418	33.69	103.23	97.7293		104.904	103.384		98.4749	94.7039	94.8905
14	586	20.92	13.1	545	20.49	13.1	589	19.89	99.7453	102.589		96.2649	101.508		103.761	101.049	100
15	243	18.47	10.8	141	17.85	12.5	186	22.88	115.323	90.3628		87.9032	89.0079		136.17	101.737	93.2
16	680	32.05	12.4	640	31.78	12.1	625	30.84	104.4	101.962		101.2	101.524		103.125	100.425	101.24
17	280	21.7	13.1	323	23.92	13.6	267	20.76	102.434	102.264		110.487	107.611		93.3437	95.3595	98.1618
18	647	27.56	12.9	508	31.85	12.6	547	30.84	109.141	94.6822		96.4351	101.637		113.681	93.2653	101.19
19	682	30.79	13.4	685	34.02	13.8	699	31.46	98.784	98.9352		98.9986	104.069		99.781	95.2528	98.5507
20	783	31.37	12.3	665	29.57	12.9	715	28.06	104.755	105.898		96.5035	102.691		108.872	103.044	97.6744
21	505	28.15	12	365	30.47	11.4	427	32.37	109.133	93.4816		92.74	97.0652		119.178	96.193	102.632
22	813	39.68	11.2	649	43.44	11.3	872	41.27	96.617	98.0737		87.2133	102.629		112.635	95.6722	99.5575
23	529	42.69	12.1	489	43.79	11.1	525	43.31	100.381	99.2842		96.5714	100.554		104.09	98.744	104.505
24	590	23.98	10	466	27.9	9.7	479	24.84	111.587	98.2689		98.643	106.159		113.305	92.9749	101.546
25	310	12.48	11.2	247	18.62	11.5	272	18.33	106.985	84.0426		95.4044	100.791		112.753	83.5124	98.6957
26	233	18.45	12.7	248	25.81	11.5	231	22.62	100.433	90.7825		103.68	107.051		96.9758	85.742	105.217
27	512	31.35	13.8	415	32.37	14	559	34.57	95.7961	95.3428		87.1199	96.8181		111.687	98.4245	99.2857
28	592	21.17	11.7	481	23.35	12	398	21.3	124.372	99.6948		110.427	104.812		111.538	95.3319	98.75
29	350	9.39	10.5	192	8.42	8.8	269	10.42	115.056	95.0576		85.6877	90.4031		141.146	105.76	109.659
30	146	9.2	15.4	181	10.57	16.6	195	12.66	87.4359	86.3349		96.4103	91.7457		90.3315	93.5194	96.3855
31	756	29.66	12.2	635	31.29	12.6	580	31.79	115.172	96.6499		104.741	99.2136		109.528	97.3953	98.4127
32	834	34.67	10	687	34.82	9.8	599	33.74	119.616	101.378		107.346	101.6		110.699	99.7846	101.02
33	730	16.52	10.5	779	17.11	10.5	755	16.47	98.3444	100.152		101.589	101.943		96.8549	98.2759	100
34	332	23.4	11.8	380	29.05	11.7	321	28.81	101.713	90.6109		109.19	100.417		93.6842	90.2754	100.427
35	129	6.18	11.3	99	6.21	11.6	96	7.02	117.188	94.0171		101.562	94.2308		115.152	99.7585	98.7069
36	107	9.43	10.3	78	9.01	11.3	108	12.05	99.537	89.1286		86.1111	87.3859		118.59	102.331	95.5752
37	592	29.05	10.3	574	32.96	11.1	512	29.81	107.812	98.7253		106.055	105.283		101.568	94.0686	96.3964
38	696	34.89	12.1	648	40.09	13.4	578	37.02	110.208	97.1232		106.055	104.146		103.704	93.5146	95.1493
39	238	21.16	12.5	282	24.75	13.4	239	23.92	99.7908	94.2308		108.996	101.735		92.1986	92.7475	96.6418
40	648	24.35	13.4	554	29.83	12.3	441	28.31	123.469	93.006		112.812	102.685		108.484	90.8146	104.472
41	514	32.84	16	474	38.62	14.9	372	36.04	119.086	95.5605		113.71	103.579		104.219	92.5168	103.691
42	273	14.81	14	308	21.15	14.2	244	19.71	105.943	87.5698		113.115	103.653		94.3182	85.0118	99.2958
43	873	23.07	10.4	962	26.32	11	810	24.38	103.889	97.3134		109.383	103.979		95.3742	93.826	97.2727
44	520	26.21	15.3	514	30.01	14.5	518	27.5	100.193	97.6545		99.6139	104.564		100.584	93.6688	102.759
45	679	30.11	11.5	636	35.23	11.2	560	31.99	110.625	97.0616		106.786	105.064		103.381	92.7335	101.339
46	239	12.79	12.7	237	13.07	11.4	238	12.77	100.21	100.078		99.7899	101.175		100.422	98.9288	105.702
47	1124	35.28	12.3	1004	38.82	12.8	909	34.57	111.826	101.027		105.226	106.147		105.976	95.4405	98.0469
48	783	31.21	16.9	672	33.41	14.8	604	30.27	114.818	101.553		105.629	105.187		108.259	96.7076	107.095
49	707	21.78	10.1	678	23.05	10.3	631	23.04	106.022	97.2656		103.724	100.022		102.139	97.2451	99.0291
50	417	29.75	10.1	388	31.69	9.2	389	32.32	103.599	96.0241		99.8715	99.0254		103.737	96.9391	104.891
51	100	5.99	14.6	79	7.1	14.4	74	7.55	117.568	89.6689		103.378	97.0199		113.291	92.1831	100.694
52	294	25.05	13.4	300	29.27	13.9	280	28.26	102.5	94.3206		103.571	101.787		99	92.7913	98.2014
53	730	32.47	14.3	599	33.78	13.1	681	37.13	103.598	93.7248		93.9794	95.4888		110.935	98.061	104.58
54	598	21.51	13.8	569	25.73	12.5	502	21.69	109.562	99.5851		106.673	109.313		102.548	91.7995	105.2
55	1010	26.55	13	811	27.15	12.1	719	26.58	120.236	99.9436		106.398	101.072		112.269	98.895	103.719
56	904	33.52	11.7	747	36.1	10.8	623	31.9	122.552	102.539		109.952	106.583		110.509	96.4266	104.167
57	849	24.04	12.4	692	25.96	12.6	620	25.96	118.468	96.302		105.806	100		111.344	96.302	99.2063
58	1120	20.13	13	1191	26.6	13.9	1177	26.76	97.5786	87.6121		100.595	99.701		97.0193	87.8383	96.7626
59	104	13.19	10.6	116	15.24	10.4	109	16.65	97.7064	89.6096		103.211	95.7658		94.8276	93.2743	100.962
60	375	15.76	13	330	18.65	13.9	311	17.03	110.289	96.2713		103.055	104.756		106.818	92.252	96.7626
61	862	38.42	12.8	977	32.85	13.2	883	32.3	98.8109	109.474		105.323	100.851		94.1146	108.478	98.4848
62	832	28.5	11.1	800	31.15	11.1	806	30.05	101.613	97.421		99.6278	101.83		102	95.7464	100
63	290	11.34	10.9	241	16.34	12.7	226	15.44	114.159	86.7228		103.319	102.915		110.166	84.7001	92.9134
64	338	16.04	15.9	296	19.69	14.4	261	16.22	114.751	99.4451		106.705	110.697		107.095	90.7313	105.208
65	869	30.23	15.7	737	28.59	14.9	821	28.81	102.923	102.464		94.8843	99.6182		108.955	102.868	102.685
66	762	23.79	13.6	653	28.81	13	656	26.58	108.079	94.7517		99.7713	104.195		108.346	91.2877	102.308
67	447	23.48	16.9	436	25.67	14.7	452	24.38	99.4469	98.1542		98.2301	102.646		101.261	95.7343	107.483
68	545	27.3	15.6	523	30.84	15.9	574	29.33	97.4739	96.5394		95.5575	102.574		102.103	94.2607	99.0566
69	545	28.24	11.1	507	31.73	10.8	550	31.93	99.5455	94.2217		96.0909	99.6868		103.748	94.5005	101.389
70	438	16.85	14.2	376	19.28	14.2	406	18.02	103.941	96.7536		96.3054	103.496		108.245	93.6981	100
71	798	27.49	13.1	653	28.87	10.9	814	27.56	99.0172	99.873		90.1106	102.377		111.103	97.61	110.092
72	1023	27.5	11.9	885	33.9	11.2	921	32.01	105.537	92.9553		98.0456	102.952		107.797	90.5605	103.125
73	719	37.3	10.9	765	41.99	11.3	705	36.36	100.993	101.293		104.255	107.742		96.9935	94.4153	98.2301
74	574	26.63	10	618	31.65	9.3	590	28.97	98.6441	95.9613		102.373	104.625		96.4401	92.0695	103.763
75	525	30.37	14.8	506	30.41	14.7	494	30.42	103.138	99.9178		101.215	99.9836		101.877	99.9342	100.34
76	37	3.52	11.6	75	7.87	9.6	32	4.43	107.812	89.7291		100	100		100	100	100
77	401	20.78	12.1	318	23.37	12.2	329	22.25	110.942	96.6966		98.3283	102.517		113.05	94.4587	99.5902
78	627	20.61	8.2	579	21.25	9	648	21.82	98.3796	97.2273		94.6759	98.6939		104.145	98.4941	95.5556
79	586	25.64	11.8	542	30.06	10.5	491	26.38	109.674	98.5974		105.193	106.975		104.059	92.648	106.19
80	365	17.98	8.5	244	20.34	8.8	247	20.03	123.887	94.8827		99.3927	100.774		124.795	94.1986	98.2955
81	146	13.46	13.4	159	16.5	14.6	141	14.48	101.773	96.4779		106.383	106.975		95.9119	90.7879	95.8904
82	721	29.76	12.7	813	30.96	12.9	789	29.22	95.6907	100.924		101.521	102.977		94.3419	98.062	99.2248
83	376	26.9	13.4	334	33.4	14	260	26.59	122.308	100.583		114.231	112.806		106.287	90.2695	97.8571
84	644	23.6	12.7	599	27.74	12.8	589	26.37	104.669	94.7478		100.849	102.598		103.756	92.5379	99.6094
85	557	15.86	13.4	418	14.63	14.2	416	14.78	116.947	103.654		100.24	99.4926		116.627	104.204	97.1831
86	173	10.33	10.7	161	13.63	11.1	124	10.82	119.758	97.7357		114.919	112.985		103.727	87.8944	98.1982
87	291	5.51	13.5	117	9.26	12.8	124	9.55	167.339	78.8482		97.1774	98.4817		174.359	79.7516	102.734
88	870	26.26	14.2	811	26.17	13.5	852	26.04	101.056	100.422		97.5939	100.25		103.637	100.172	102.593
89	502	18.05	12.1	475	19.95	11.8	493	18.26	100.913	99.425		98.1744	104.628		102.842	95.2381	101.271
90	1148	31.11	12.2	1178	32.72	11.6	1058	31.9	104.253	98.7618		105.671	101.285		98.7267	97.5397	102.586
91	924	30.07	13.2	872	33.16	13	980	32.24	97.1429	96.6346		94.4898	101.427		102.982	95.3408	100.769
92	860	41.36	15.1	846	43.32	14	809	43.38	103.152	97.6717		102.287	99.9308		100.827	97.7378	103.929
93	508	8.22	12.4	582	11.98	12.9	510	9.08	99.8039	95.2643		107.059	115.969		93.6426	84.3072	98.062
94	1504	37.11	15.4	1075	42.77	12.8	1182	41.53	113.621	94.6785		95.4738	101.493		119.953	93.3832	110.156
95	461	24.45	12.2	401	29.17	11.2	433	26.17	103.233	96.7138		96.3048	105.732		107.481	91.9095	104.464
96	493	28.9	12	665	34.1	12.5	639	32.21	88.5759	94.8618		102.034	102.934		87.0677	92.3754	98
97	458	26.29	12	456	26.12	10.3	371	22.75	111.725	107.78		111.456	107.407		100.219	100.325	108.252
98	339	14.11	15.6	376	15.47	15.1	362	13.34	96.8232	102.886		101.934	107.984		95.0798	95.6044	101.656
99	568	23.48	12.8	600	28.62	13.2	609	26.39	96.6338	94.4865		99.2611	104.225		97.3333	91.0203	98.4848
100	1323	25.07	13.4	1240	30.37	13.2	1357	28.92	98.7472	93.3437		95.689	102.507		103.347	91.2743	100.758
101	108	8.18	9.6	88	6.7	8.7	107	6.89	100.467	109.361		91.1215	98.6212		111.364	111.045	105.172
102	565	27.8	15	589	31.24	14.5	598	29.76	97.2408	96.707		99.2475	102.487		97.9626	94.4942	101.724
103	390	19.87	15.4	391	25.78	15.3	366	24.07	103.279	91.2754		103.415	103.552		99.8721	88.5376	100.327
104	257	17.17	16.3	215	19.87	15.6	215	18.45	109.767	96.5312		100	103.848		109.767	93.2058	102.244
105	464	23.64	14.9	437	29.7	14.5	354	26.54	115.537	94.5365		111.723	105.953		103.089	89.798	101.379
106	1261	38.82	14.2	998	40.05	13	1003	37.97	112.861	101.119		99.7507	102.739		113.176	98.4644	104.615
107	397	19.47	12.3	336	23.06	12.8	294	22.78	117.517	92.7349		107.143	100.615		109.077	92.216	98.0469
108	371	14.26	16.6	318	16.34	14.6	306	15.84	110.621	95.0126		101.961	101.578		108.333	93.6353	106.849
109	403	11.49	12.6	542	28.74	12.2	436	27.09	96.2156	71.2071		112.156	103.045		87.1771	69.9896	101.639
110	460	31.01	10.5	377	34.02	11.4	387	32.23	109.432	98.1074		98.708	102.777		111.008	95.5761	96.0526
111	268	9.1	13.6	272	12.68	13.7	252	11.45	103.175	89.738		103.968	105.371		99.2647	85.8833	99.635
112	334	16.8	14.4	361	20.22	13.6	314	18.06	103.185	96.5116		107.484	105.98		96.2604	91.543	102.941
113	799	33.5	13.5	773	36.62	13.1	737	34.31	104.206	98.8196		102.442	103.366		101.682	95.74	101.527
114	271	20.17	10.2	312	27.52	10	312	22.83	93.4295	94.1743		100	110.272		93.4295	86.6461	101
115	1429	41.49	14	1123	42.55	13.3	1099	43.21	115.014	98.0097		101.092	99.2363		113.624	98.7544	102.632
116	780	29.22	16.1	784	31.57	14.7	760	31.87	101.316	95.8425		101.579	99.5293		99.7449	96.2781	104.762
117	961	28.65	17.7	756	32.99	16.8	661	31.59	122.693	95.3466		107.186	102.216		113.558	93.4222	102.679
118	727	34.59	10.2	698	38.38	11	653	34.24	105.666	100.511		103.446	106.046		102.077	95.0625	96.3636
