# Supplementary material for: Performance Evaluation of the Becton Dickinson FACSPresto™ Near-Patient CD4 Instrument in a Laboratory and Typical Field Clinic Setting in South Africa
Source: PLoS One. 2016 May 25;11(5):e0156266. doi: 10.1371/journal.pone.0156266 (PMC4880207; doi:10.1371/journal.pone.0156266)
Supplement: S3 Fig — (XLSX) [file pone.0156266.s003.xlsx]

## Sheet: EQA
	AFEQAS Trim Pool Mean	Validation #CD4		AFEQAS Trim Pool Mean	Validation CD4%
Sample 1	550.74	452		41.19	44.17
Sample 2	600.59	522		46.73	49.57
Sample 3	624.28	536		45.03	47.01
Sample 4	587.05	513		45.97	49.04
Sample 5	550.51	455		47.54	49.67
Sample 6	125.23	102		17.92	18.64
Sample 7	119.78	92		16.19	17.18
Sample 8	130.08	105		20.65	20.35
Sample 9	136.14	126		19.86	21.09
Sample 10	139.54	104		17.93	17.06
Sample 11	550.74	457		41.19	44.52
Sample 12	600.59	543		46.73	49.93
Sample 13	624.28	511		45.03	46.39
Sample 14	587.05	529		45.97	48.26
Sample 15	550.51	487		47.54	49.69
Sample 16	125.23	99		17.92	17.2
Sample 17	119.78	93		16.19	15.62
Sample 18	130.08	106		20.65	20.38
Sample 19	136.14	106		19.86	18.88
Sample 20	139.54	127		17.93	19.76
