# Supplementary material for: Performance Evaluation of the Becton Dickinson FACSPresto™ Near-Patient CD4 Instrument in a Laboratory and Typical Field Clinic Setting in South Africa
Source: PLoS One. 2016 May 25;11(5):e0156266. doi: 10.1371/journal.pone.0156266 (PMC4880207; doi:10.1371/journal.pone.0156266)
Supplement: S4 Fig — (XLSX) [file pone.0156266.s004.xlsx]

## Sheet: All Capillary samples
	All Capillary samples Presto				Venous samples all
Sample	CD4#	CD4%	HB		PLGCD4#	PLGCD4%	PrestoCD4#	PrestoCD4%
1	365	31.04	10.6		9	4.41	6	3.39
2	550	27.79	13.7		13	4.95	29	7.3
3	805	37.49	11.6		15	3.16	28	5.91
4	202	16.42	12.4		16	2.88	11	1.47
5	547	22.29	11.1		17	1.94	25	2.1
6	494	33.71	11.5		19	4.15	23	4.78
7	283	13.94	12.3		20	1.92	13	1.31
8	175	25.69	9.2		28	6.95	34	7.39
9	291	9.44	11		29	14.61	20	12.13
10	572	39.35	12.4		31	4.16	38	4.64
11	348	36.6	14.6		32	4.43	75	7.87
12	402	29.3	13.1		34	5.74	32	5.54
13	459	35.97	13.7		42	6.16	53	5.49
14	545	20.49	13.1		46	3.67	47	3.96
15	141	17.85	12.5		49	5.08	93	8.66
16	640	31.78	12.1		54	3.46	59	3.61
17	323	23.92	13.6		56	22.94	55	19.48
18	508	31.85	12.6		67	8.61	70	7.81
19	685	34.02	13.8		68	10.08	101	10.47
20	665	29.57	12.9		74	7.55	79	7.1
21	365	30.47	11.4		78	5.4	111	6.28
22	649	43.44	11.3		80	4.63	57	3.07
23	489	43.79	11.1		81	13.72	111	13.99
24	466	27.9	9.7		86	8.22	96	9.48
25	247	18.62	11.5		87	7.41	146	9.9
26	248	25.81	11.5		94	12.04	104	13.29
27	415	32.37	14		94	3.01	105	3.42
28	481	23.35	12		96	11.68	121	12.87
29	192	8.42	8.8		96	7.02	99	6.21
30	181	10.57	16.6		97	7.49	119	8.01
31	635	31.29	12.6		99	15.08	118	17.68
32	687	34.82	9.8		100	3.44	80	7.15
33	779	17.11	10.5		102	14.48	108	15.73
34	380	29.05	11.7		107	6.89	88	6.7
35	99	6.21	11.6		108	12.05	78	9.01
36	78	9.01	11.3		109	16.65	116	15.24
37	574	32.96	11.1		114	8.29	114	8.07
38	648	40.09	13.4		119	5.57	168	7.04
39	282	24.75	13.4		123	5.92	198	9.45
40	554	29.83	12.3		124	10.82	161	13.63
41	474	38.62	14.9		124	9.55	117	9.26
42	308	21.15	14.2		127	8.14	164	8.96
43	962	26.32	11		132	13.73	138	14.24
44	514	30.01	14.5		133	11.04	159	14.27
45	636	35.23	11.2		140	14.14	207	17.43
46	237	13.07	11.4		141	14.48	159	16.5
47	1004	38.82	12.8		144	12.53	280	19.34
48	672	33.41	14.8		145	13.27	152	14.25
49	678	23.05	10.3		145	17.64	171	18.62
50	388	31.69	9.2		150	8.84	95	6.46
51	79	7.1	14.4		157	14.95	171	13.89
52	300	29.27	13.9		160	17.28	177	18.44
53	599	33.78	13.1		162	12.04	202	16.42
54	569	25.73	12.5		165	25.7	175	25.69
55	811	27.15	12.1		172	7.15	236	9.38
56	747	36.1	10.8		186	22.88	141	17.85
57	692	25.96	12.6		189	8.11	184	8.21
58	1191	26.6	13.9		193	4.05	247	6.56
59	116	15.24	10.4		195	12.66	181	10.57
60	330	18.65	13.9		196	13.76	178	12.74
61	977	32.85	13.2		200	14.98	250	16.42
62	800	31.15	11.1		202	10.29	216	10.92
63	241	16.34	12.7		207	13.79	288	16.68
64	296	19.69	14.4		215	18.45	215	19.87
65	737	28.59	14.9		219	10.26	291	9.44
66	653	28.81	13		220	15.3	213	18.39
67	436	25.67	14.7		226	14.43	300	17.6
68	523	30.84	15.9		226	15.44	241	16.34
69	507	31.73	10.8		229	26.4	257	27.95
70	376	19.28	14.2		231	22.62	248	25.81
71	653	28.87	10.9		236	18.15	251	19.52
72	885	33.9	11.2		238	12.77	237	13.07
73	765	41.99	11.3		239	23.92	282	24.75
74	618	31.65	9.3		244	19.71	308	21.15
75	506	30.41	14.7		247	22.67	283	23.52
76	75	7.87	9.6		247	17.66	294	19.83
77	318	23.37	12.2		247	20.03	244	20.34
78	579	21.25	9		248	19.5	313	21.2
79	542	30.06	10.5		252	9.8	270	9.99
80	244	20.34	8.8		252	16.52	352	18.11
81	159	16.5	14.6		252	11.45	272	12.68
82	813	30.96	12.9		255	12.21	283	13.94
83	334	33.4	14		257	21.07	260	22.05
84	599	27.74	12.8		260	18.85	281	19.03
85	418	14.63	14.2		260	26.59	334	33.4
86	161	13.63	11.1		261	16.22	296	19.69
87	117	9.26	12.8		265	18.03	334	20.9
88	811	26.17	13.5		267	20.76	323	23.92
89	475	19.95	11.8		269	10.42	192	8.42
90	1178	32.72	11.6		272	18.33	247	18.62
91	872	33.16	13		273	24.03	284	25.02
92	846	43.32	14		280	28.26	300	29.27
93	582	11.98	12.9		282	23.49	346	28.13
94	1075	42.77	12.8		288	20.01	327	19.49
95	401	29.17	11.2		290	13.42	364	14.85
96	665	34.1	12.5		292	14.61	345	16.5
97	456	26.12	10.3		292	9.18	363	11.18
98	376	15.47	15.1		294	24.43	362	26.16
99	600	28.62	13.2		294	22.78	336	23.06
100	1240	30.37	13.2		298	8.79	338	9.79
101	88	6.7	8.7		301	23.64	301	23.29
102	589	31.24	14.5		305	18.67	260	15.25
103	391	25.78	15.3		306	15.84	318	16.34
104	215	19.87	15.6		307	33.12	348	34.15
105	437	29.7	14.5		311	17.03	330	18.65
106	998	40.05	13		312	19.97	342	19.56
107	336	23.06	12.8		312	22.83	312	27.52
108	318	16.34	14.6		314	18.06	361	20.22
109	542	28.74	12.2		321	28.81	380	29.05
110	377	34.02	11.4		322	26.33	336	25.39
111	272	12.68	13.7		323	14.25	417	16.2
112	361	20.22	13.6		325	19.26	444	24.33
113	773	36.62	13.1		329	22.25	318	23.37
114	312	27.52	10		331	13.52	292	14.26
115	1123	42.55	13.3		334	31.22	363	29.46
116	784	31.57	14.7		337	36.56	348	36.6
117	756	32.99	16.8		340	20.66	410	22.26
118	698	38.38	11		347	27.36	402	29.3
					354	26.54	437	29.7
					357	17.45	450	19.82
					358	20.47	433	24.37
					359	15.06	383	15.58
					360	15.4	342	14.55
					362	30.83	365	31.04
					362	13.34	376	15.47
					363	23.51	355	23.7
					364	14.59	536	16.76
					366	24.07	391	25.78
					367	23.45	418	26.4
					371	22.75	456	26.12
					372	36.04	474	38.62
					373	13.05	399	13.89
					373	27.31	446	29.7
					381	17.15	400	18.23
					381	16.73	483	19.55
					381	19.42	410	22.08
					384	8.6	427	9.12
					386	21.13	447	24.49
					387	32.23	377	34.02
					389	32.32	388	31.69
					398	21.3	481	23.35
					406	20.67	464	23.39
					406	18.02	376	19.28
					414	20.17	432	20.48
					415	19.01	447	21.56
					416	14.78	418	14.63
					417	18.88	469	19.84
					418	33.69	459	35.97
					420	19.85	383	18.94
					422	15.72	550	19.19
					425	24.66	445	25.56
					425	13.15	478	15.6
					427	14.95	499	17.94
					427	32.37	365	30.47
					431	29.32	446	30.26
					433	26.17	401	29.17
					436	25.77	491	27.39
					436	27.09	542	28.74
					437	27.54	458	28.92
					437	20.4	484	23.26
					437	14.46	395	17.35
					438	21.5	518	23.62
					439	19.78	535	21.93
					441	22.89	480	22.99
					441	28.31	554	29.83
					442	21.7	497	24.75
					449	23.34	521	25.29
					450	16.53	514	18.29
					450	29.27	491	31.48
					452	24.38	436	25.67
					454	20.58	562	22.86
					454	13.38	503	16.07
					461	32.72	515	34.5
					461	31.63	562	34.81
					466	22.65	521	25.79
					466	16.59	594	20.4
					470	12.36	512	13.67
					471	15.93	643	18.94
					472	32.8	494	33.71
					473	30.18	527	31.01
					478	17.16	590	19.64
					479	24.84	466	27.9
					485	24.9	550	27.79
					485	20.89	547	22.29
					491	26.38	542	30.06
					493	15.94	612	18.14
					493	18.26	475	19.95
					494	30.42	506	30.41
					496	21.51	516	22.64
					497	25.77	542	27.1
					497	10.44	684	12.37
					502	21.69	569	25.73
					506	20.65	576	22.27
					510	29.23	567	30.09
					510	9.08	582	11.98
					511	20.2	510	22
					512	24.61	538	24.42
					512	27.97	613	31.37
					512	29.81	574	32.96
					513	18.09	556	18.86
					513	22.83	520	23.99
					514	16.9	544	18.02
					515	20.4	571	20.93
					517	21.27	544	23.24
					518	28.59	531	30.32
					518	27.5	514	30.01
					520	17.21	611	19.12
					523	23.29	561	29.24
					525	43.31	489	43.79
					537	26.59	594	28.67
					542	44.7	625	47.52
					547	30.84	508	31.85
					550	31.93	507	31.73
					552	19.77	573	20.21
					557	22.92	709	27.08
					557	39.7	618	40.39
					559	34.57	415	32.37
					560	31.99	636	35.23
					561	23.98	576	23.76
					568	26.82	560	28.48
					574	29.33	523	30.84
					575	35.69	572	39.35
					578	37.02	648	40.09
					580	31.79	635	31.29
					585	19.2	762	23.65
					586	22.3	582	23.18
					589	28.6	629	31.94
					589	19.89	545	20.49
					589	26.37	599	27.74
					590	28.97	618	31.65
					598	29.76	589	31.24
					599	33.74	687	34.82
					604	30.27	672	33.41
					608	25.13	706	27.03
					609	26.39	600	28.62
					612	27.1	665	28.64
					620	25.96	692	25.96
					622	24.85	659	24.72
					623	31.9	747	36.1
					625	30.84	640	31.78
					631	33.31	805	37.49
					631	23.04	678	23.05
					637	37.75	579	38.16
					639	32.21	665	34.1
					641	28.27	644	28.68
					646	20.1	734	21.6
					648	21.82	579	21.25
					653	34.24	698	38.38
					656	26.58	653	28.81
					661	31.59	756	32.99
					666	35.56	696	37.89
					670	21.13	784	23.24
					681	37.13	599	33.78
					684	27.7	730	30.09
					696	26.73	824	30.51
					699	31.46	685	34.02
					705	36.36	765	41.99
					711	23.9	787	26
					715	28.06	665	29.57
					719	26.58	811	27.15
					721	23.2	781	24.05
					737	34.31	773	36.62
					740	21.87	796	22.68
					755	16.47	779	17.11
					760	31.87	784	31.57
					761	32.35	805	34.87
					769	29.94	857	33.25
					786	23.78	881	26.24
					789	29.22	813	30.96
					802	29.33	790	29.18
					806	30.05	800	31.15
					809	43.38	846	43.32
					810	24.38	962	26.32
					814	27.56	653	28.87
					821	28.81	737	28.59
					837	31.56	829	31.98
					843	23.84	920	25.86
					852	26.04	811	26.17
					872	41.27	649	43.44
					883	32.52	934	34.25
					883	32.3	977	32.85
					909	34.57	1004	38.82
					910	30.16	806	31.11
					918	39.83	952	41.99
					921	32.01	885	33.9
					948	33.15	924	32.56
					972	27.02	961	30.34
					980	32.24	872	33.16
					1003	37.97	998	40.05
					1019	21.9	1088	21.91
					1058	31.9	1178	32.72
					1099	43.21	1123	42.55
					1102	40.46	1077	39.8
					1177	26.76	1191	26.6
					1182	41.53	1075	42.77
					1357	28.92	1240	30.37
					1610	49.08	1603	47.13
